# Supplementary material
Source: publisher site journal article supplement (https://www.degruyterbrill.com/publication/isbn/9783486598964/downloadAsset/9783486598964_Inhaltsverzeichnis.pdf)
Supplement: Supplementary file 1 [file 9783486598964_Inhaltsverzeichnis.pdf]

# Inhaltsverzeichnis

|                                                                           |           |
|---------------------------------------------------------------------------|-----------|
| <b>Vorwort</b>                                                            | <b>v</b>  |
| <b>1 Allgemeine Formulierung: Erster Teil und einfache Beispiele</b>      | <b>1</b>  |
| 1.1 Die Grundannahmen in Umrissen . . . . .                               | 1         |
| 1.2 Observablen und zugeordnete Operatoren . . . . .                      | 5         |
| 1.2.1 Das Korrespondenzprinzip . . . . .                                  | 5         |
| 1.2.2 Schrödinger-Darstellung und Aufenthaltswahrscheinlichkeit . . . . . | 8         |
| 1.2.3 Vektoroperatoren . . . . .                                          | 10        |
| 1.3 Die Parität . . . . .                                                 | 13        |
| 1.4 Der harmonische Oszillator . . . . .                                  | 17        |
| 1.4.1 Der lineare Oszillator . . . . .                                    | 17        |
| 1.4.2 Der dreidimensionale isotrope Oszillator . . . . .                  | 20        |
| 1.5 Die Zeitentwicklung der Erwartungswerte . . . . .                     | 22        |
| 1.6 Die allgemeine Unschärferelation . . . . .                            | 25        |
| 1.7 Periodische Potentiale in einer Raumdimension . . . . .               | 28        |
| 1.7.1 Die allgemeine Theorie . . . . .                                    | 29        |
| 1.7.2 Das periodische Kastenpotential als Beispiel . . . . .              | 32        |
| <b>2 Der Drehimpuls</b>                                                   | <b>37</b> |
| 2.1 Drehimpuls-Algebra und Spektrum . . . . .                             | 37        |
| 2.2 Der Bahndrehimpuls eines Teilchens . . . . .                          | 41        |
| 2.2.1 Spektrum und Eigenvektoren . . . . .                                | 41        |
| 2.2.2 Kugelfunktionen . . . . .                                           | 44        |
| <b>3 Gebundene Zustände in einem Zentralpotential</b>                     | <b>49</b> |
| 3.1 Vertauschbare Operatoren und simultane Eigenvektoren . . . . .        | 49        |
| 3.2 Das diskrete Spektrum des Hamilton-Operators . . . . .                | 51        |
| 3.3 Der isotrope Oszillator nochmals . . . . .                            | 58        |
| 3.4 Ein Teilchen im Coulomb-Potential . . . . .                           | 60        |
| 3.4.1 Die Eigenfunktionen des Hamilton-Operators . . . . .                | 60        |
| 3.4.2 Die dynamische Symmetrie . . . . .                                  | 66        |
| <b>4 Geladene Teilchen im äußeren elektromagnetischen Feld</b>            | <b>70</b> |
| 4.1 Minimale Kopplung und Eichinvarianz . . . . .                         | 71        |

|          |                                                                                             |            |
|----------|---------------------------------------------------------------------------------------------|------------|
| 4.2      | Spezialfälle äußerer Felder . . . . .                                                       | 74         |
| 4.3      | Mehrere Teilchen . . . . .                                                                  | 75         |
| <b>5</b> | <b>Störungstheorie der Eigenwerte</b>                                                       | <b>77</b>  |
| 5.1      | Störungstheorie eines mehrfachen Eigenwertes . . . . .                                      | 77         |
| 5.1.1    | Vorbemerkungen zur Basiswahl . . . . .                                                      | 77         |
| 5.1.2    | Die Störung als formale Potenzreihe . . . . .                                               | 79         |
| 5.2      | Einfache Anwendung: Modell des Leuchtelektrons für Alkaliatome . . .                        | 84         |
| <b>6</b> | <b>Streuprozesse</b>                                                                        | <b>86</b>  |
| 6.1      | Fourier-Transformation und Temperierte Distributionen . . . . .                             | 86         |
| 6.1.1    | Die rasch abfallenden Testfunktionen . . . . .                                              | 86         |
| 6.1.2    | Temperierte Distributionen . . . . .                                                        | 89         |
| 6.2      | Wellenpakete freier Teilchen . . . . .                                                      | 93         |
| 6.3      | Die Resolvente des freien Hamilton-Operators und Greensche Funktionen                       | 97         |
| 6.4      | Schema eines Streuexperiments und Wirkungsquerschnitt . . . . .                             | 100        |
| 6.5      | Streuung eines Teilchens an einem zeitunabhängigen Potential . . . . .                      | 101        |
| 6.6      | Streulösungen und Wirkungsquerschnitt . . . . .                                             | 107        |
| 6.7      | Streuung am Zentralpotential . . . . .                                                      | 111        |
| 6.7.1    | Partialwellen und Streuphasen . . . . .                                                     | 111        |
| 6.7.2    | Das attraktive Exponentialpotential als Beispiel . . . . .                                  | 119        |
| 6.8      | Die Streuung am Coulomb-Potential . . . . .                                                 | 125        |
| 6.9      | Die Møller-Operatoren . . . . .                                                             | 128        |
| 6.10     | Møller-Operatoren und Eigendistributionen der Lippmann-Schwinger-Gl.                        | 133        |
| 6.11     | Der Streuoperator . . . . .                                                                 | 137        |
| <b>7</b> | <b>Teilchen mit Spin-<math>\frac{1}{2}</math></b>                                           | <b>140</b> |
| 7.1      | Hilbert-Raum und Observablen . . . . .                                                      | 140        |
| 7.2      | Ein Spin- $\frac{1}{2}$ -Teilchen im elektromagnetischen Feld . . . . .                     | 142        |
| 7.2.1    | Allgemeiner Hamilton-Operator . . . . .                                                     | 142        |
| 7.2.2    | Die Bewegung im Feld einer zeitunabhängigen homogenen ma-<br>gnetischen Induktion . . . . . | 145        |
| 7.3      | Der Gesamtdrehimpuls und die Clebsch-Gordan-Koeffizienten . . . . .                         | 149        |
| 7.4      | Die Spin-Bahn-Kopplung . . . . .                                                            | 152        |
| <b>8</b> | <b>Zur Spektraltheorie selbstadjungierter Operatoren</b>                                    | <b>155</b> |
| 8.1      | Die Spektralzerlegung . . . . .                                                             | 155        |
| 8.2      | Eigendistributionen und verallgemeinerte Vollständigkeitsrelation . . . .                   | 159        |
| <b>9</b> | <b>Allgemeine Formulierung: Zweiter Teil</b>                                                | <b>164</b> |
| 9.1      | Die Meßwahrscheinlichkeit spezieller Observablenwerte . . . . .                             | 164        |
| 9.2      | Der Statistische Operator . . . . .                                                         | 167        |
| 9.2.1    | Reine Gesamtheiten . . . . .                                                                | 167        |

|           |                                                                       |            |
|-----------|-----------------------------------------------------------------------|------------|
| 9.2.2     | Gemischte Gesamtheiten . . . . .                                      | 170        |
| 9.3       | Die Bilder der Zeitentwicklung . . . . .                              | 176        |
| 9.3.1     | Das Schrödinger-Bild . . . . .                                        | 176        |
| 9.3.2     | Das Heisenberg-Bild . . . . .                                         | 178        |
| 9.3.3     | Das Wechselwirkungsbild . . . . .                                     | 179        |
| 9.3.4     | Der Oszillator im äußeren Feld als Beispiel . . . . .                 | 182        |
| 9.4       | Die Bewegungsumkehr . . . . .                                         | 185        |
| 9.5       | Meßprozeß und Korrelationen . . . . .                                 | 189        |
| <b>10</b> | <b>Identische Teilchen</b>                                            | <b>194</b> |
| 10.1      | Das Tensorprodukt von Hilbert-Räumen . . . . .                        | 194        |
| 10.2      | Fermi-Dirac-Statistik und Bose-Einstein-Statistik . . . . .           | 196        |
| 10.3      | Zwei Elektronen im Coulomb-Potential . . . . .                        | 203        |
| 10.3.1    | Die Grobstruktur heliumartiger Atome . . . . .                        | 203        |
| 10.3.2    | Variationsmethoden und Grundzustand . . . . .                         | 208        |
| 10.4      | Das $n$ -Elektronen-Atom: der Virialsatz . . . . .                    | 211        |
| 10.5      | Der Fock-Raum . . . . .                                               | 213        |
| 10.6      | Erzeugungs- und Vernichtungsoperatoren und der Feldoperator . . . . . | 216        |
| 10.6.1    | Bosonen . . . . .                                                     | 216        |
| 10.6.2    | Fermionen . . . . .                                                   | 223        |
| 10.7      | Die großkanonische Gesamtheit . . . . .                               | 230        |
| 10.7.1    | Modell unabhängiger Teilchen und mittlere Besetzungszahlen . . . . .  | 232        |
| 10.7.2    | Ideale Quantengase . . . . .                                          | 235        |
| <b>A</b>  | <b>Lineare Operatoren in einem separablen komplexen Hilbert-Raum</b>  | <b>240</b> |
| A.1       | Hilbert-Räume . . . . .                                               | 240        |
| A.1.1     | Der abstrakte Hilbert-Raum . . . . .                                  | 240        |
| A.1.2     | Folgerungen aus den Axiomen . . . . .                                 | 241        |
| A.1.3     | Konkrete Hilbert-Räume . . . . .                                      | 243        |
| A.2       | Lineare Operatoren . . . . .                                          | 245        |
| A.2.1     | Beschränkte auf ganz $\mathcal{H}$ definierte Operatoren . . . . .    | 245        |
| A.2.2     | Unbeschränkte Operatoren . . . . .                                    | 248        |
| A.2.3     | Das Spektrum eines selbstadjungierten Operators . . . . .             | 249        |
|           | <b>Lösungen der Aufgaben</b>                                          | <b>253</b> |
|           | <b>Literaturverzeichnis</b>                                           | <b>279</b> |
|           | <b>Index</b>                                                          | <b>282</b> |
